# Supplementary material for: Targeted Sequencing of the 9p21.3 Region Reveals Association with Reduced Disease risks in Ashkenazi Jewish Centenarians
Source: bioRxiv or medRxiv preprint supplement (doi:10.1101/2023.05.19.23290237), 2023-05-23
Supplement: Supplementary file [file media-1.pdf]

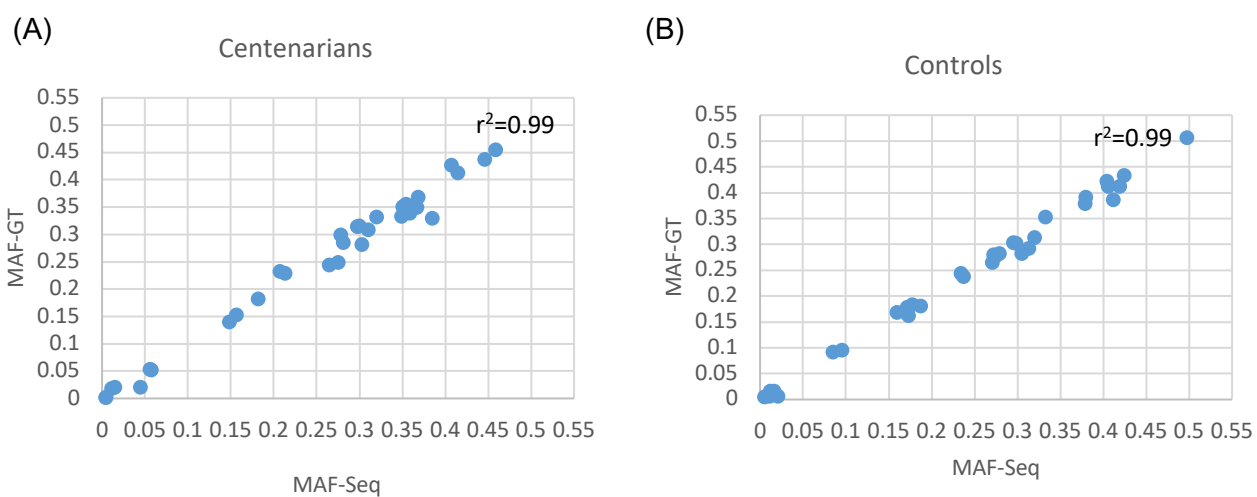

**Figure S1** Genotyping validation of variant allele frequency called from pooled capture sequencing for (A) centenarians and (B) controls. See Table S1 for list of assayed variants.

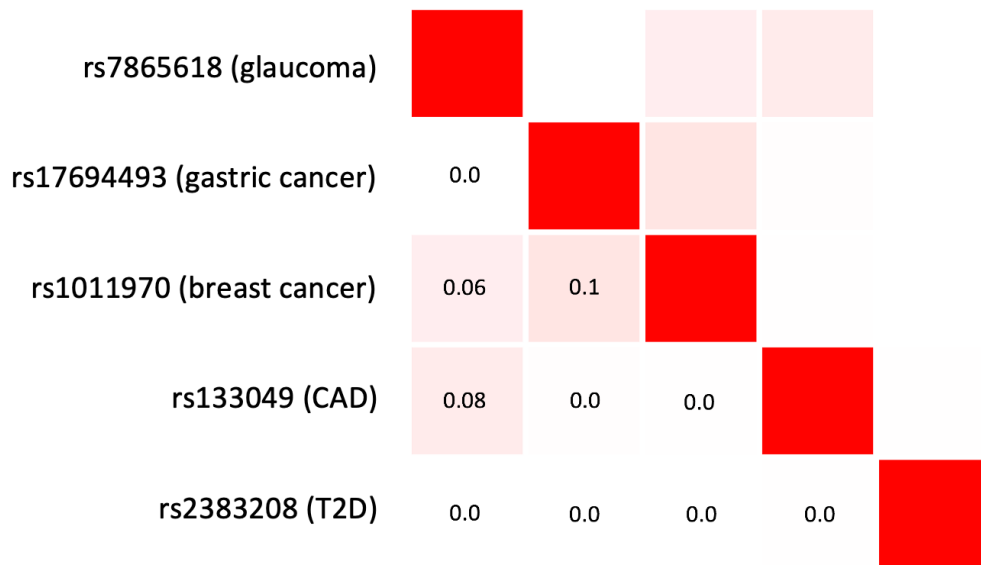

**Figure S2** LD matrix for the five representative GWAS SNPs in all populations from LDLink database. Numbers in the squares indicate R squared correlation.

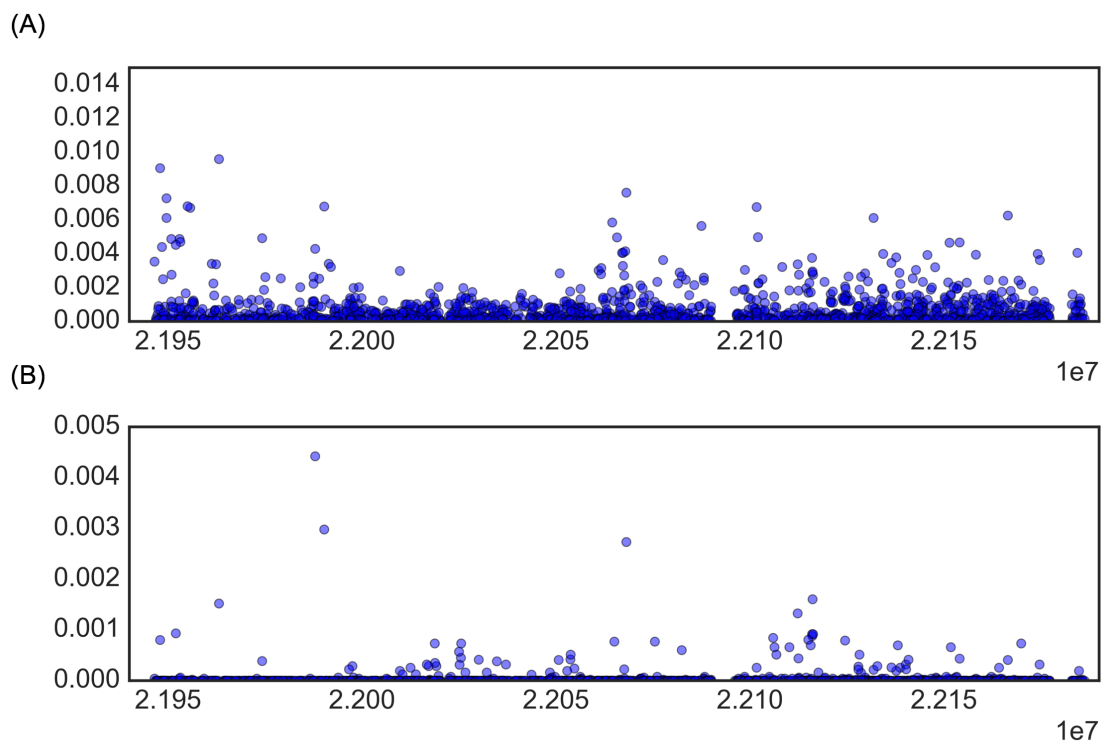

**Figure S3** Feature importance for all variants in (A) random forest classifier and (B) stochastic gradient boosting classifier for centenarian association.

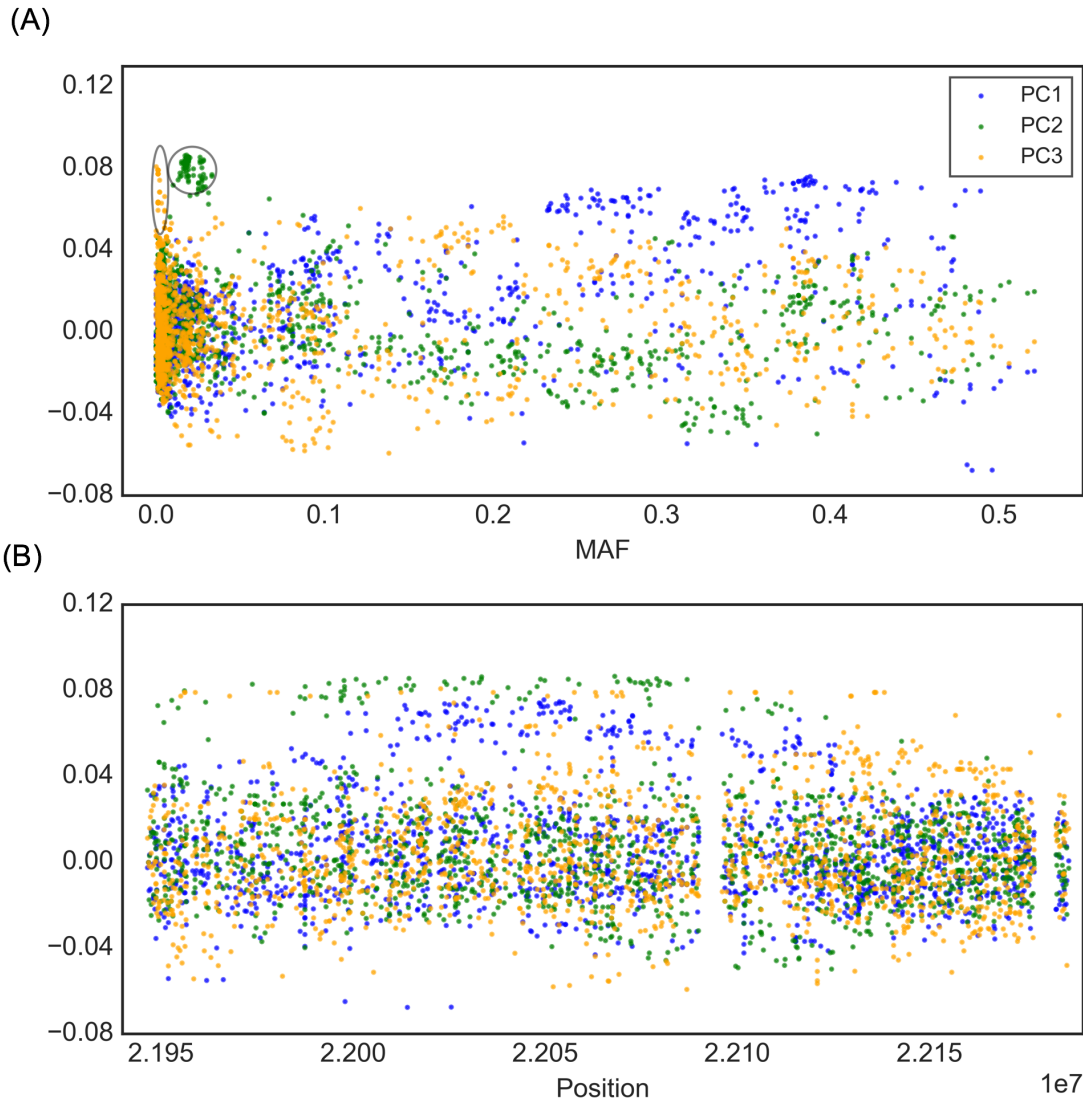

**Figure S4** 2D plots denoting feature weight (y axis) for all SNPs in the first 3 principle components versus their (A) minor allele frequency and (B) position.

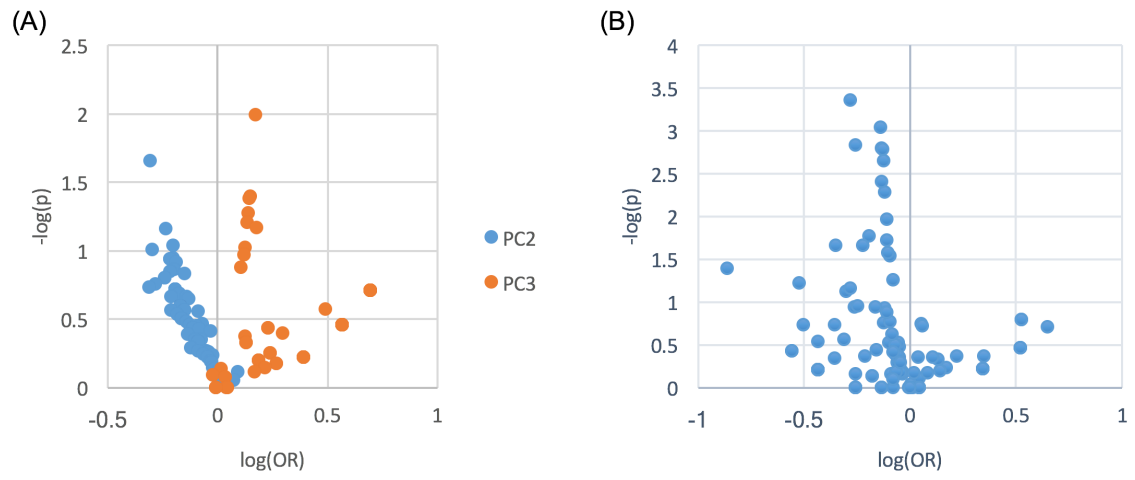

**Figure S5** Volcano plots for (A) important feature SNPs in the principle components 2 and 3 and (B) CDKN2A-downstream SNPs.

**Table S1** List of variants validated by genotyping (attached xlsx separately)

| ID          | MAF-Sequencing |          | MAF-Genotyping |          |
|-------------|----------------|----------|----------------|----------|
|             | Centenarians   | Controls | Centenarians   | Controls |
| rs111310495 | 0.002          | 0.016    | 0.004          | 0.016    |
| Nov22068072 | 0.002          | 0.016    | 0.004          | 0.012    |
| Nov22089832 | 0.020          | 0.006    | 0.045          | 0.021    |
| rs576966099 | 0.018          | 0.005    | 0.011          | 0.005    |
| rs1011970   | 0.140          | 0.162    | 0.148          | 0.173    |
| rs1063192   | 0.309          | 0.283    | 0.310          | 0.279    |
| rs10738612  | 0.438          | 0.506    | 0.446          | 0.497    |
| rs10757260  | 0.350          | 0.413    | 0.367          | 0.419    |
| rs10757261  | 0.351          | 0.422    | 0.351          | 0.404    |
| rs10757272  | 0.413          | 0.379    | 0.415          | 0.379    |
| rs10811661  | 0.182          | 0.169    | 0.182          | 0.160    |
| rs11515     | 0.153          | 0.183    | 0.157          | 0.178    |
| rs11521166  | 0.053          | 0.092    | 0.056          | 0.085    |
| rs12335941  | 0.339          | 0.413    | 0.359          | 0.406    |
| rs1333039   | 0.299          | 0.244    | 0.278          | 0.235    |
| rs1333040   | 0.332          | 0.302    | 0.320          | 0.299    |
| rs1333042   | 0.369          | 0.353    | 0.369          | 0.333    |
| rs1333049   | 0.456          | 0.434    | 0.459          | 0.424    |
| rs1412829   | 0.281          | 0.265    | 0.303          | 0.270    |
| rs1412832   | 0.229          | 0.181    | 0.213          | 0.187    |
| rs2157719   | 0.314          | 0.280    | 0.298          | 0.272    |
| rs2383207   | 0.356          | 0.313    | 0.355          | 0.320    |
| rs2518722   | 0.244          | 0.304    | 0.265          | 0.295    |
| rs3731197   | 0.330          | 0.386    | 0.385          | 0.412    |
| rs3731211   | 0.249          | 0.282    | 0.275          | 0.305    |
| rs4977574   | 0.427          | 0.392    | 0.407          | 0.379    |
| rs497756    | 0.286          | 0.238    | 0.281          | 0.237    |
| rs523096    | 0.333          | 0.293    | 0.350          | 0.314    |
| rs72652408  | 0.021          | 0.007    | 0.015          | 0.011    |
| rs74605971  | 0.052          | 0.095    | 0.057          | 0.095    |
| rs75059952  | 0.232          | 0.179    | 0.207          | 0.172    |
| rs7865618   | 0.316          | 0.279    | 0.300          | 0.275    |

**Table S2:** List of all reported GWAS variants in the 9p21.3 sequenced region and their longevity association result.

|                      | <b>SKAT-O</b> | <b>SKAT</b> | <b>SKAT-C</b> |
|----------------------|---------------|-------------|---------------|
| CDKN2A_downstream    | 0.0024*       | 0.1380      | 0.0282*       |
| CDKN2A               | 0.7045        | 0.4285      | 0.1655        |
| CDKN2B               | 1.0000        | 0.8812      | 0.4409        |
| CDKN2BAS1            | 1.0000        | 0.8812      | 0.4250        |
| CDKN2BAS1_downstream | 1.0000        | 0.8812      | 0.4212        |
| Total                | 0.9904        | 0.8812      | 0.3128        |

**Table S3:** Adjusted p value from SKAT analysis of sequenced region and subdivisions.
